1 **Research Letter**

2 **Temporal changes in sleep parameters and body mass index after using the Pokémon**

3 **Sleep app**

4

5 **Masao Iwagami<sup>1,2+</sup>, Jaehoon Seol<sup>1,3,4+</sup>, Masashi Yanagisawa<sup>1,5</sup>**

6 <sup>1</sup>International Institute for Integrative Sleep Medicine (IIS), University of Tsukuba, Tsukuba,

7 Ibaraki, Japan

8 <sup>2</sup>Institute of Medicine, University of Tsukuba, Tsukuba, Ibaraki, Japan

9 <sup>3</sup>Institute of Health and Sport Sciences, University of Tsukuba, Tsukuba, Ibaraki, Japan

10 <sup>4</sup>Department of Frailty Research, Center for Gerontology and Social Science, National Center

11 for Geriatrics and Gerontology, Obu, Aichi, Japan

12 <sup>5</sup>S'UIMIN Inc., Shibuya, Tokyo, Japan

13 <sup>+</sup>Co-first authors (contributed equally)

14

15 **Corresponding author:**

16 Masashi Yanagisawa

17 International Institute for Integrative Sleep Medicine (IIS), University of Tsukuba, 1-1-1

18 Tennodai, Tsukuba, Ibaraki, 305-8575, Japan

19 Email: [yanagisawa.masa.fu@u.tsukuba.ac.jp](mailto:yanagisawa.masa.fu@u.tsukuba.ac.jp)

20 **Abstract**

21 Pokémon Sleep is a new sleep-tracking game app released in July 2023. We examined  
22 whether sleep parameters would improve with the use of the Pokémon Sleep app, and  
23 whether participants' improvement status was associated with changes in their body mass  
24 index (BMI). We analyzed data from 2,063 volunteer Japanese participants (mean age  $38.3 \pm$   
25  $10.7$  years, female 82.1%) who used both the Pokémon Sleep and Asken (a commonly-used  
26 app in Japan to record daily BMI) for  $\geq 90$  days. During the 90 days, improvement was seen  
27 in total sleep time (TST) for 44.8% of participants, sleep latency for 18.1%, and percentage  
28 of wakefulness after sleep onset for 24.4%. BMI tended to decrease faster in participants with  
29 improved TST and sleep latency. In conclusion, the Pokémon Sleep app can improve some  
30 sleep parameters, and by association, lead to improvement in BMI.

## 31 **Introduction**

32 In the era of digital health, a variety of mobile apps have been developed to record daily  
33 health-related parameters (e.g., step counts and screen time), with some including game  
34 elements to nudge users towards better health behaviors. Among these apps are a small  
35 number designed to track sleep behaviors and characteristics; however, their influence on  
36 users' behavioral and clinical outcomes remains unknown [1, 2].

37 Pokémon Sleep (The Pokémon Company, Tokyo, Japan) is a sleep-tracking app  
38 released in July 2023 in multiple countries, including Japan and the United States. Compared  
39 to previous sleep-tracking apps [1, 2], Pokémon Sleep has a stronger game element,  
40 rewarding users with points for longer sleep and the ability to raise Pokémon. Therefore, it  
41 can be hypothesized that key sleep parameters, such as total sleep time (TST), sleep latency  
42 (the duration from the start time in bed to sleep onset), and wakefulness after sleep onset  
43 (WASO), will improve after starting Pokémon Sleep. Further, we hypothesized that people  
44 whose sleep improved after starting Pokémon Sleep would also have improved health  
45 indicators, specifically, body mass index (BMI).

46 To examine these hypotheses, we conducted a retrospective observational study of  
47 data from users of both Pokémon Sleep and Asken (asken, Inc., Tokyo, Japan), an app  
48 commonly used in Japan to record daily diets and BMI [3].

49

50 **Methods**

51 Details of the Pokémon Sleep and Asken apps are described elsewhere [3, 4]. In brief,  
52 Pokémon Sleep tracks and records daily sleep characteristics using the accelerometer  
53 functions of mobile phones or smart devices named Pokémon GO Plus+. Users are instructed  
54 to keep the app open and place the device by their pillow, or other location where it will  
55 detect only the user's body movements. Using algorithms established by Cole and Kripke [5],  
56 Pokémon Sleep distinguishes between periods of sleep and wakefulness. From these records,  
57 we calculated daily TST, sleep latency, and the proportion of WASO (%WASO) during TST.  
58 Asken is a calorie and nutrition tracker that also monitors daily BMI.

59 In-app messages were sent to all Asken users from January 19 through 31, 2024,  
60 asking those who used both Pokémon Sleep and Asken for permission to use their stored data.  
61 Respondents were asked to provide their Pokémon Sleep user IDs in their electronic informed  
62 consent so that the Pokémon Sleep and Asken data were linkable. The study was approved by  
63 the Institutional Review Board of Sapporo Yurinokai Hospital, Japan.

64 Using the retrieved data, we identified when each participant had started using  
65 Pokémon Sleep ("day 0"), and included those continuing it until day 89, with or without gaps.  
66 Persons were excluded if they had not used Asken during the 90 days of Pokémon Sleep  
67 recordings, or did not have BMI recordings at days 0 and 89 (i.e., the first and last dates). For

68 gaps or days when the participants did not use Pokémon Sleep or Asken, missing data were  
69 imputed linearly from the records immediately before and after the day.

70 In statistical analysis, we summarized the basic characteristics of participants  
71 including age, sex, and baseline BMI. We also cross-sectionally estimated cubic spline curves  
72 for each sleep parameter (days 0–6 average) with BMI on day 0, based on a generalized  
73 additive model. Second, we plotted the average trend of each sleep parameter from days 0 to  
74 89. For each sleep characteristic, we then classified participants into two groups,  
75 improved/not improved, based on the slope calculated for individuals during the 90 days. We  
76 regarded a slope  $>0$  as an improvement in TST, and a slope  $<0$  as an improvement in sleep  
77 latency and %WASO. Finally, for each sleep parameter, we plotted the average change in  
78 BMI from days 0 to 89 by group. Repeated-measures analysis of variance (ANOVA) at days  
79 0, 29, 59, and 89 was used to test whether the temporal trend in BMI differed between the  
80 groups, adjusting for age and sex.

81 All analyses were performed using Python (version 3.12.2), which was built into  
82 Visual Studio Code (version 1.87.2). Statistical significance was set at  $P < 0.05$  (2-tailed).

83

## 84 **Results**

85 Of 6,052 responses to our request, 3,934 participants used Pokémon Sleep for  $\geq 90$  days, and  
86 2,063 participants were included for the analysis (**Supplementary Figure 1**). Of the 90 days,

87 the mean number of days spent on Pokémon Sleep and Asken was 64.1 (standard deviation  
88 [SD] 16.6 days) and 59.6 (SD 28.6 days), respectively. Participants' baseline characteristics  
89 are shown in **Supplementary Table 1**. In the cross-sectional analysis (**Supplementary**  
90 **Figure 2**), longer TST (up to around 8.5 hours) and shorter sleep latency were associated  
91 with lower BMI.

92 On average, the TST increased from days 0 to 89 by approximately 0.5 hours,  
93 whereas sleep latency and %WASO were nearly constant (**Supplementary Figure 3**).  
94 However, calculating the slope for individuals, 924 (44.8%), 374 (18.1%), and 504 (24.4 %)   
95 participants were classified as “improved” for TST, sleep latency, and %WASO, respectively.  
96 Participants' baseline characteristics by improvement status are shown in **Supplementary**  
97 **Table 2**.

98 **Figure 1** shows the temporal changes in BMI by improvement status groups.  
99 Regardless of the groups, participants' BMI tended to decrease during the 90 days. However,  
100 participants with improved TST (**panel A**) showed a steeper and more sustained decline in  
101 BMI than did the non-improved group, although the difference was not statistically  
102 significant in the repeated-measures ANOVA ( $P=0.107$ ). The mean change in BMI at day 89  
103 was -0.38 and -0.19, respectively (unadjusted difference=-0.19, 95% confidence interval [CI]:  
104 -0.40–0.03; age-sex-adjusted difference=-0.25, 95% CI: -0.51–0.01). Participants with  
105 improved sleep latency (**panel B**) showed a significantly faster decline in BMI than the non-

106 improved group ( $P=0.030$ ). The mean change in BMI at day 89 was -0.51 and -0.23,  
107 respectively (unadjusted difference=-0.28, 95% CI: -0.56–0.00; age-sex-adjusted difference=-  
108 0.36, 95% CI: -0.69–0.02). There was no significant difference ( $P=0.851$ ) in the amount of  
109 BMI change by %WASO improvement status (**panel C**).

110

## 111 **Discussion**

112 In this study of 2,063 volunteer participants using both Pokémon Sleep and Asken for  $\geq 90$   
113 days, improvement was seen in TST for 44.8% of participants, sleep latency for 18.1%,  
114 and %WASO for 24.4%. Participants' BMI tended to decrease during the 90 days, most likely  
115 because Asken users are typically motivated to control their diets and decrease their body  
116 weight. However, BMI tended to decrease faster in participants with improved TST (without  
117 a statistical significance) and sleep latency (with a statistical significance). Potential  
118 mechanisms may include improvement of appetite-related hormones (e.g., ghrelin and leptin),  
119 or changes in energy metabolism and balance [6, 7].

120 This study had several limitations. The Pokémon Sleep app was the first to use the  
121 accelerometer functions of mobile phones to measure sleep on the bed. To our knowledge, its  
122 validity in distinguishing between sleep and wakefulness has not been rigorously tested in  
123 comparison to polysomnography or actigraphy. Second, those who used both Pokémon Sleep

124 and Asken for  $\geq 90$  days may be highly health-conscious and the generalizability of our  
125 findings to more general populations is thus unknown.

126           Despite these limitations, to our knowledge, this is the first evidence in the general  
127 population that a sleep-tracking app can improve some sleep parameters, and by association,  
128 lead to improvement in physical health parameters (i.e., BMI). Further studies are warranted  
129 to further examine whether the use of sleep-tracking apps can improve sleep and physical  
130 health parameters, and ultimately, their long-term health.

131

### 132 **Acknowledgements**

133 We express our gratitude to the personnel of The Pokémon Company (Tokyo, Japan), asken  
134 Inc. (Tokyo, Japan), and S'UIMIN Inc. (Tokyo, Japan) for their contributions to data  
135 preparation. We also thank Editage ([www.editage.com](http://www.editage.com)) for the English language editing.

136

### 137 **Data Availability Statement**

138 The data underlying this article cannot be shared publicly for the privacy of individuals that  
139 participated in the study. The data may be shared on reasonable request to the corresponding  
140 author.

141

### 142 **Disclosure Statement**



143 M.Y. was paid by The Pokémon Company (Tokyo, Japan) for consultation in developing the

144 Pokémon Sleep app. M.I. and J.S. declare no conflicts of interest.

145

## 146 **References**

147 1. Robbins R, Seixas A, Walton Masters L, et al. Sleep tracking: A systematic review of the

148 research using commercially available technology. *Curr Sleep Med Rep*.

149 2019;5(3):156-163. doi: [10.1007/s40675-019-00150-1](https://doi.org/10.1007/s40675-019-00150-1).

150 2. Behar J, Roebuck A, Domingos JS, Geder E, Clifford GD. A review of current sleep

151 screening applications for smartphones. *Physiol Meas*. 2013;34(7):R29-R46. doi:

152 [10.1088/0967-3334/34/7/R29](https://doi.org/10.1088/0967-3334/34/7/R29).

153 3. Matsuzaki E, Michie M, Kawabata T. Validity of nutrient intakes derived from an Internet

154 Website dish-based dietary record for self-management of weight among Japanese

155 women. *Nutrients*. 2017;9(10). doi: [10.3390/nu9101058](https://doi.org/10.3390/nu9101058).

156 4. The Pokémon Company. Pokémon sleep. [https://support.pokemon.com/hc/en-](https://support.pokemon.com/hc/en-us/categories/360005098972-Pok%C3%A9mon-Sleep)

157 [us/categories/360005098972-Pok%C3%A9mon-Sleep](https://support.pokemon.com/hc/en-us/categories/360005098972-Pok%C3%A9mon-Sleep). Accessed May 29, 2024.

158 5. Cole RJ, Kripke DF, Gruen W, Mullaney DJ, Gillin JC. Automatic sleep/wake

159 identification from wrist activity. *Sleep*. 1992;15(5):461-469. doi:

160 [10.1093/sleep/15.5.461](https://doi.org/10.1093/sleep/15.5.461).

- 161 6. Stich FM, Huwiler S, D’Hulst G, Lustenberger C. The potential role of sleep in promoting  
162 a healthy body composition: Underlying mechanisms determining muscle, fat, and  
163 bone mass and their association with sleep. *Neuroendocrinology*. 2022;112(7):673-  
164 701. doi: [10.1159/000518691](https://doi.org/10.1159/000518691).
- 165 7. St-Onge MP, Cherta-Murillo A, Darimont C, Mantantzis K, Martin FP, Owen L. The  
166 interrelationship between sleep, diet, and glucose metabolism. *Sleep Med Rev*.  
167 2023;69:101788. doi: [10.1016/j.smrv.2023.101788](https://doi.org/10.1016/j.smrv.2023.101788).

168

## 169 **Figure legends**

### 170 **Figure 1. Temporal changes in body mass index by improvement status of total sleep**

### 171 **time (panel A), sleep latency (panel B), and % wakefulness after sleep onset (panel C)**

172 BMI, body mass index; %WASO, percentage of wakefulness after sleep onset; SD, standard  
173 deviation.

174

## 175 **Supplemental files**

### 176 **Supplementary Figure 1. Participant flow chart**

### 177 **Supplementary Table 1. Baseline characteristics of study participants**

### 178 **Supplementary Figure 2. Cross-sectional associations between sleep parameters and**

### 179 **body mass index at baseline**

- 180 **Supplementary Figure 3. Temporal changes in sleep parameters, overall and by**  
181 **improvement status**
- 182 **Supplementary Table 2. Baseline characteristics of study participants by improvement**  
183 **status for sleep parameters**

**(A) Subgroup by improvement status of total sleep time**

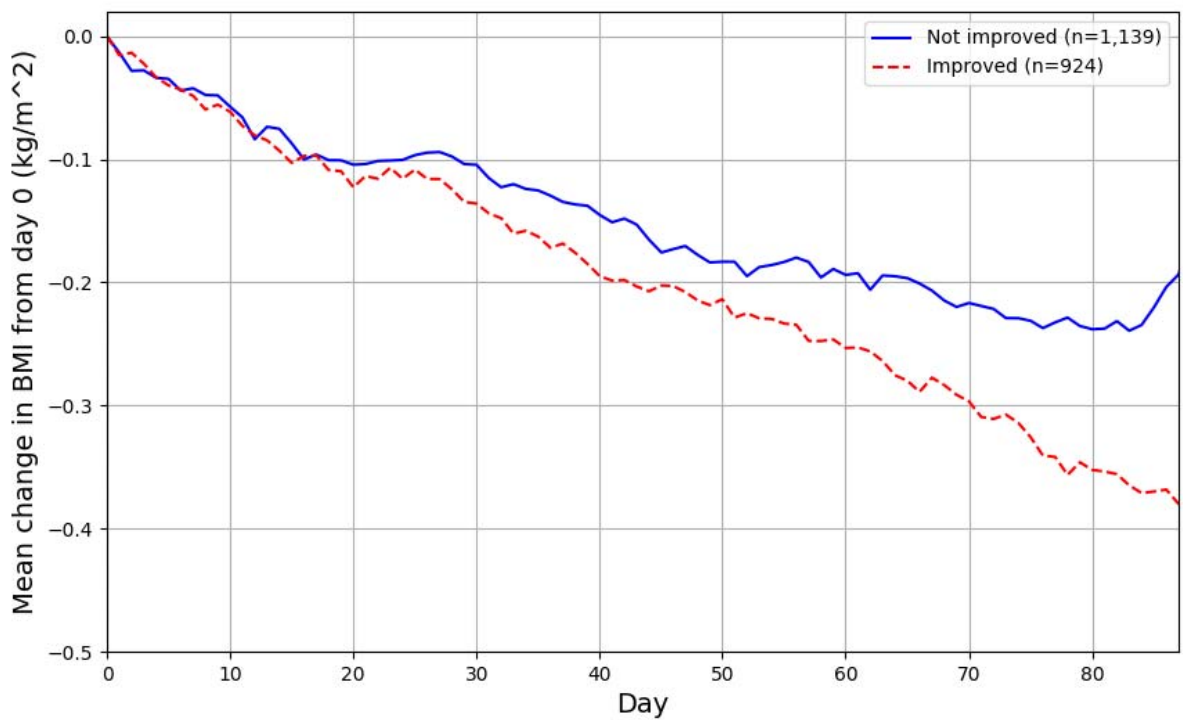

| Mean change in BMI from day 0 (SD) | Day 29          | Day 59          | Day 89          |
|------------------------------------|-----------------|-----------------|-----------------|
| Not improved (n=1,139)             | -0.11<br>(0.60) | -0.19<br>(0.93) | -0.19<br>(2.43) |
| Improved (n=924)                   | -0.14<br>(0.53) | -0.25<br>(1.08) | -0.38<br>(2.55) |

**(B) Subgroup by improvement status of sleep latency**

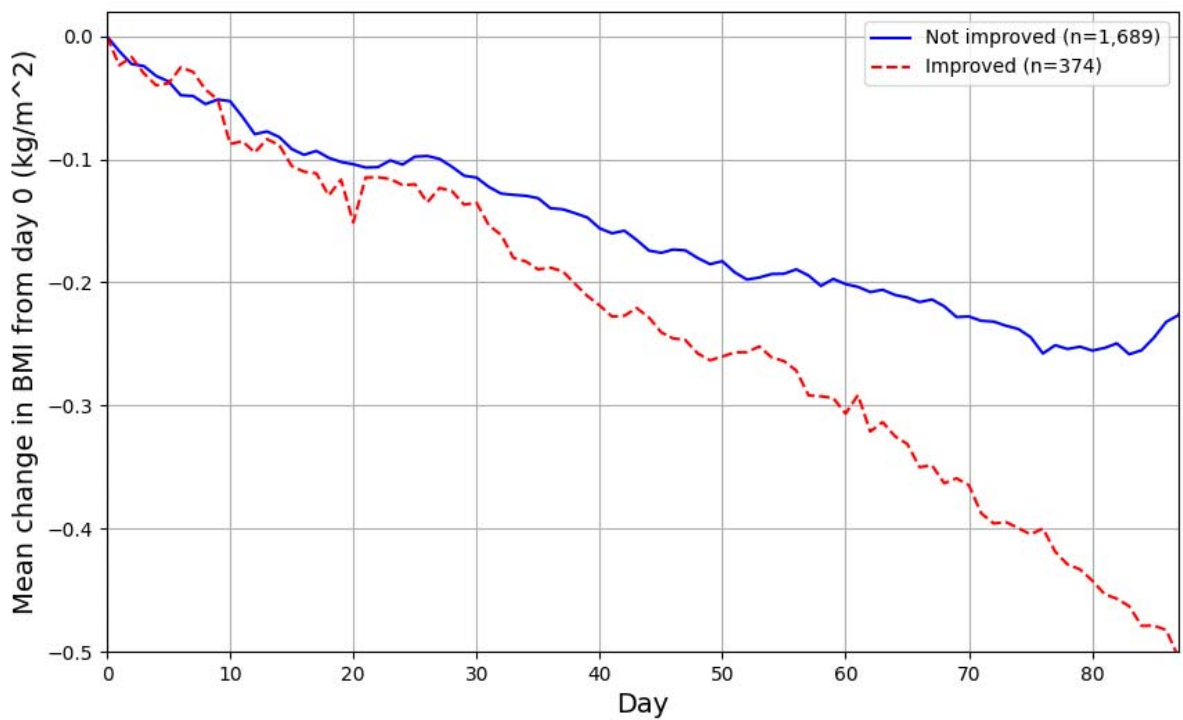

| Mean change in BMI from day 0 (SD) | Day 29          | Day 59          | Day 89          |
|------------------------------------|-----------------|-----------------|-----------------|
| Not improved (n=1,689)             | -0.11<br>(0.58) | -0.20<br>(0.97) | -0.23<br>(2.48) |
| Improved (n=374)                   | -0.14<br>(0.53) | -0.29<br>(1.07) | -0.51<br>(2.51) |

**(C) Subgroup by improvement status of %WASO**

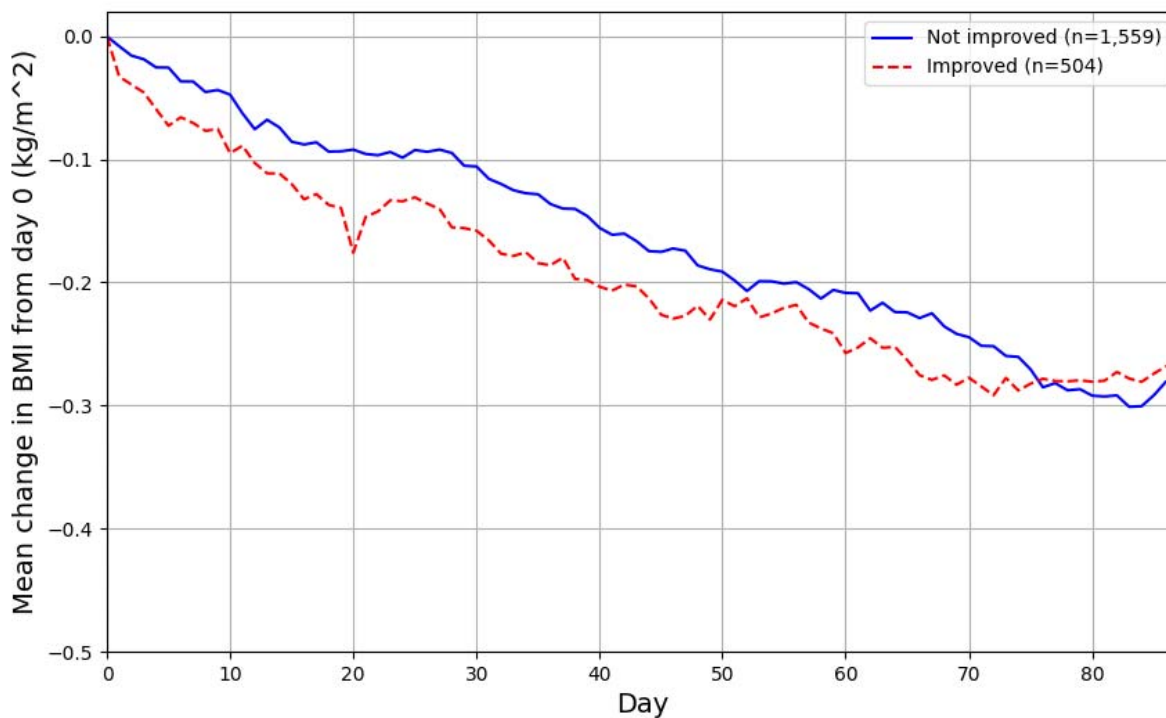

| Mean change in BMI from day 0 (SD) | Day 29          | Day 59          | Day 89          |
|------------------------------------|-----------------|-----------------|-----------------|
| Not improved (n=1,559)             | -0.11<br>(0.60) | -0.21<br>(1.02) | -0.28<br>(2.49) |
| Improved (n=504)                   | -0.16<br>(0.49) | -0.24<br>(0.87) | -0.27<br>(2.50) |
